# Supplementary material for: Merkel Cell Carcinoma—Update on Diagnosis, Management and Future Perspectives
Source: MDPI journal article supplement (doi:10.3390/cancers15010103), 2022-12-23
Supplement: s1 [file s1]

# Merkel Cell Carcinoma—Update on Diagnosis, Management and Future Perspectives

**Table S1.** Available active and/or recruiting and/or not yet recruiting, interventional clinical trials and expanded access programs (EAP) for combination therapies with checkpoint inhibitors for advanced unresectable or metastatic MCC available at <https://clinicaltrials.gov/> as of April 2022. N: Number of patients for original estimated enrollment, RP2D: Recommended phase 2 dose, TLR: Toll like receptor, BORR: Best overall response rate, MTD: Maximum tolerated dose.

| Available Clinical trials with Checkpoint Inhibitors in Combination Therapies for Advanced Unresectable or Metastatic MCC |       |     |                                                                             |                                                                                                 |                                                                                         |
|---------------------------------------------------------------------------------------------------------------------------|-------|-----|-----------------------------------------------------------------------------|-------------------------------------------------------------------------------------------------|-----------------------------------------------------------------------------------------|
| NCT number                                                                                                                | Phase | N   | Drugs                                                                       | Mode of action                                                                                  | Primary objective                                                                       |
| 04393753                                                                                                                  | 2     | 40  | - Domatinostat<br>- Avelumab in patients progressing under anti-PD1/PD-L1   | - Histone deacetylase inhibitor<br>- Anti-PD-L1                                                 | ORR                                                                                     |
| 03787602                                                                                                                  | 1b/2  | 27  | - KRT-232 +/-<br>- Avelumab in p53 Wild-Type MCC                            | - Oral inhibitor of MDM2, an E3 ubiquitin ligase<br>- Anti-PD-L1                                | RP2D of KRT-232 ORR                                                                     |
| 04261855                                                                                                                  | 1b/2  | 65  | - Avelumab + Lutetium-177-Dotatate<br>- Avelumab + External Beam Radiation  | - Anti-PD-L1<br>- Peptide receptor radionuclide therapy                                         | PFS at 12 months                                                                        |
| 04590781                                                                                                                  | 1b/2  | 142 | - XmAb18087 +/-<br>- Pembrolizumab                                          | - Monoclonal antibody targeting somatostatin receptor 2 and CD3<br>- Anti-PD-1                  | Treatment-emergent adverse events<br>ORR, CR, PR rate                                   |
| 03901573                                                                                                                  | 1b/2a | 64  | - Atezolizumab<br>- NT-17                                                   | - Anti-PD-L1<br>- Efineptakin Alfa, a fusion protein of recombinant IL-7 and a hybrid Fc region | MTD, RP2D of NT-17                                                                      |
| 02978625                                                                                                                  | 2     | 68  | - Intralesional TVEC followed by TVEC and Nivolumab                         | - Oncolytic herpes virus immunotherapy<br>- Anti-PD-1                                           | Response rate to TVEC alone<br>BORR to combination                                      |
| 04916002                                                                                                                  | 2     | 268 | - Intralesional CMP-001<br>- Cemiplimab-rwlc                                | - TLR9 agonist<br>- Anti-PD-1                                                                   | ORR                                                                                     |
| 04116320                                                                                                                  | 1     | 32  | - Focused US Ablation +/-<br>- Standard-of-care anti-PD1 +/-<br>- Imiquimod | - Continuous high-intensity focused US to ablate tissue<br>- Anti-PD-1<br>- TLR7/8 agonist      | Safety of FUSA<br>Proportion of patients with increased CD8+ T cell tissue infiltration |
| 03747484                                                                                                                  | 1/2   | 16  | - FH-MCVA2TCR<br>- Avelumab or Pembrolizumab,                               | - Autologous MCPyV-specific HLA-A02-restricted TCR-                                             | Toxicity<br>BORR                                                                        |

|          |      |     |                                                                                                         |                                                                                                             |                                                    |
|----------|------|-----|---------------------------------------------------------------------------------------------------------|-------------------------------------------------------------------------------------------------------------|----------------------------------------------------|
|          |      |     | - Radiation therapy                                                                                     | transduced CD4+ and CD8+ T-cells<br>- Anti-PD-1                                                             |                                                    |
| 03435640 | 1/2  | 393 | - Intralesional NKTR-262<br>- Bempegaldesleukin<br>- +/-Nivolumab                                       | - TLR7/8 agonist<br>- CD122 agonist<br>- Anti-PD-1                                                          | Safety and tolerability<br>ORR                     |
| 03000257 | 1    | 118 | - Venetoclax<br>- Rovzalpituzumab Tesirine<br>- ABBV-181                                                | - BCL-2 inhibitor<br>- Antibody-drug conjugate directed against delta-like protein 3<br>- Anti-PD-1         | Safety Pharmacokinetics of venetoclax and ABBV-181 |
| 02635672 | 1    | 50  | - VIP152 with dose-escalation<br>- Pembrolizumab                                                        | - CDK9 inhibitor<br>- Anti-PD-1                                                                             | Safety Pharmacokinetics<br>MTD, RP2D               |
| 04458259 | 1    | 37  | - PF-07265807 +/-<br>- Sasanlimab                                                                       | - Axl/mertk tumor-associated macrophage kinase inhibitor<br>- Anti-PD-1                                     | Safety<br>ORR and CR rate                          |
| 04551885 | 1    | 27  | - FT516<br>- Avelumab                                                                                   | - CD16 Fc receptor<br>- Anti-PD-1                                                                           | Dose-limiting toxicities                           |
| 05069935 | 1    | 189 | - FT538<br>- Avelumab                                                                                   | - Allogeneic NK-cell immunotherapy<br>- Anti-PD-L1                                                          | Safety<br>RP2D                                     |
| 03841110 | 1    | 64  | - FT500 +/-<br>- ICI (nivolumab, pembrolizumab, atezolizumab)<br>+/-<br>- IL-2                          | - Allogeneic, iPSC-derived NK cell immunotherapy<br>- ICI                                                   | Dose-limiting toxicity                             |
| 03228667 | 2    | 105 | - N803<br>- PD-1/PD-L1 inhibitors +/-<br>- PD-L1 t-haNK                                                 | - IL15 superagonist complex combined with BCG<br>- NK-92 expressing IL-2, CD16 and a CAR recognizing PD-L1  | ORR                                                |
| 04234113 | 1/1b | 96  | - SO-C101 +/-<br>- Pembrolizumab                                                                        | - IL15 superagonist<br>- Anti-PD-1                                                                          | Safety<br>Dose-limiting toxicities                 |
| 03074513 | 2    | 160 | - Atezolizumab<br>- Bevacizumab                                                                         | - Anti-PD-L1<br>- Anti-VEGF                                                                                 | ORR                                                |
| 04902040 | 1b/2 | 12  | - Radiation therapy<br>- PD-1/PD-L1 inhibitors +/-<br>- Plinabulin<br>after progression on anti-PD-(L)1 | - Radiation therapy<br>- PD-1/PD-L1 inhibitors +/-<br>- Polymerization of tubulin blockade                  | Safety<br>ORR                                      |
| 05269381 | 1    | 36  | -Cyclophosphamide -<br>Neoantigen peptide vaccine<br>- Sargramostim<br>- Pembrolizumab                  | - Chemotherapy<br>- Vaccine<br>- GM-CSF<br>- Anti-PD-1                                                      | Safety                                             |
| 03236935 | 1b   | 12  | - L-NMMA<br>- Pembrolizumab                                                                             | - NG-monomethyl-L-arginine, a pan-nitric oxide synthase inhibitor<br>- Anti-PD-1                            | MTD                                                |
| 04725331 | 1/2a | 48  | - Intralesional BT-001<br>- Pembrolizumab                                                               | - Oncolytic Vaccinia virus encoding for human CTLA4-specific antibody 4-E03 and human GM-CSF<br>- Anti-PD-1 | Safety<br>RP2D<br>ORR<br>Disease control rate      |

|          |     |    |                                          |                                                                                                               |                |
|----------|-----|----|------------------------------------------|---------------------------------------------------------------------------------------------------------------|----------------|
| 05086692 | 1/2 | 80 | - MDNA11 +/-<br>- Anti-PD1 or Anti-PD-L1 | - Long-acting "beta-only"<br>recombinant interleukin-2 (rIL-<br>2) albumin fusion<br>- Anti-PD1 or Anti-PD-L1 | Safety<br>RP2D |
|----------|-----|----|------------------------------------------|---------------------------------------------------------------------------------------------------------------|----------------|

**Table S2.** Available active and/or recruiting and/or not yet recruiting, interventional clinical trials and expanded access programs (EAP) for checkpoint inhibitors in advanced unresectable or metastatic MCC available at <https://clinicaltrials.gov/> as of April 2022. N: Number of patients for original estimated enrollment, RP2D: Recommended phase 2 dose, EAP: expanded access program, TLR: Toll like receptor, MTD: Maximum tolerated dose.

#### Available Clinical Trials with Checkpoint Inhibitors in Advanced Unresectable or Metastatic MCC

| NCT number                        | Phase | N   | Drugs                                                                                                                           | Mode of action                                                       | Primary objective                                                             |
|-----------------------------------|-------|-----|---------------------------------------------------------------------------------------------------------------------------------|----------------------------------------------------------------------|-------------------------------------------------------------------------------|
| 03783078                          | 3     | 50  | - Pembrolizumab as first-line agent                                                                                             | - Anti-PD-1                                                          | ORR                                                                           |
| 04792073                          | 2     | 36  | - Avelumab<br>- Comprehensive Ablative Radiotherapy                                                                             | - Anti-PD-L1                                                         | PFS                                                                           |
| 03599713                          | 2     | 90  | - Retifanlimab                                                                                                                  | - Anti-PD-1                                                          | ORR                                                                           |
| 03089658                          | EAP   |     | - Avelumab                                                                                                                      | - Anti-PD-L1                                                         | Available results [15]                                                        |
| 03071406                          | 2     | 50  | - Nivolumab<br>- Ipilimumab<br>- +/- Stereotactic body radiation                                                                | - Anti-PD-1<br>- Anti-CTLA4                                          | ORR<br>Preliminary results available [102]                                    |
| 02155647<br>JAVELIN Merkel<br>200 | 2     | 84  | - Avelumab<br>Part A: after chemotherapy failure<br>Part B: first-line                                                          | - Anti-PD-L1                                                         | Part A: BORR<br>Part B: Durable response rate<br>Available results [7, 9, 11] |
| 03304639                          | 2     | 96  | - Pembrolizumab +/-<br>- Stereotactic body radiation                                                                            | - Anti-PD-1                                                          | PFS                                                                           |
| 03071757                          | 1     | 180 | - ABBV-368<br>+/- ABBV-181                                                                                                      | - Anti-OX40 agonist<br>- Anti-PD-1                                   | Safety Pharmacokinetics of ABBV-368                                           |
| 03212404                          | 1     | 80  | - Cosibelimab                                                                                                                   | - Anti-PD-1                                                          | Dose-limiting toxicity<br>Safety<br>ORR                                       |
| 04187872                          | 1     | 15  | - Laser Interstitial Thermal Therapy<br>- Pembrolizumab in patients with brain metastasis after failure of stereotactic therapy | - Minimally invasive neurosurgical technique<br>- Anti-PD-1          | Immune effect of combination therapy                                          |
| 04260802                          | 1b/2a | 80  | - OC-001 +/-<br>- Anti-PD1 or Anti-PD-L1                                                                                        | - Targets tumor necrosis factor receptor<br>- Anti-PD1 or Anti-PD-L1 | Dose-limiting toxicity<br>Safety                                              |
| 04157985                          | 3     | 578 | Treatment duration of PD-1/PD-L1 inhibitors among responders                                                                    | - Anti-PD-1/PD-L1                                                    | PFS                                                                           |
| 04140526                          | 1a/2b | 91  | - ONC-392 +/-<br>- Pembrolizumab                                                                                                | - Humanized anti-CTLA4<br>- Anti-PD-1                                | MTD, RP2D<br>Dose-limiting toxicity<br>Safety                                 |
| 05078047                          | 3     | 646 | Evaluation of a reduced dose intensity among responders to ICI                                                                  | - ICI                                                                | PFS                                                                           |

**Table S3.** Available active and/or recruiting and/or not yet recruiting, interventional clinical trials and expanded access programs (EAP) for targeted therapies and immune based strategies in advanced unresectable or metastatic MCC available at <https://clinicaltrials.gov/> as of April 2022. N: Number of patients for original estimated enrollment, RP2D: Recommended phase 2 dose, EAP: expanded access program, TLR: Toll like receptor, MTD: Maximum tolerated dose, TIL: Tumor infiltrating lymphocytes.

| Available Clinical Trials with Targeted Therapies and Immune-based Strategies in Advanced Unresectable or Metastatic MCC |       |     |                                                                            |                                                                                        |                                                                |
|--------------------------------------------------------------------------------------------------------------------------|-------|-----|----------------------------------------------------------------------------|----------------------------------------------------------------------------------------|----------------------------------------------------------------|
| NCT number                                                                                                               | Phase | N   | Drugs                                                                      | Mode of action                                                                         | Primary objective                                              |
| 02465957                                                                                                                 | 2     | 24  | - aNK<br>- ALT-803                                                         | - Activated NK-92 (allogenic Natural Killer cell line)<br>- IL-15 superagonist complex | PFS                                                            |
| 02036476                                                                                                                 | 2     | 12  | - Cabozantinib after platinum-based therapy progression                    | - Multi-target tyrosine kinase inhibitors                                              | Disease Control Rate, Available results [97]                   |
| 02819843                                                                                                                 | 2     | 34  | - T-VEC +/-<br>- Hypofractionated radiotherapy for skin metastasis         | - Oncolytic herpes virus immunotherapy                                                 | CR and PR rate                                                 |
| 04160065                                                                                                                 | 1     | 20  | - Intralesional IFx-Hu2.0 for skin, LN metastasis                          | - Plasmid DNA vaccine encoding for a streptococcal membrane protein, Emm55             | Treatment-emergent adverse events                              |
| 04349436                                                                                                                 | 1b/2  | 30  | - Intralesional RP1 in organ transplant recipients for skin, LN metastasis | - Oncolytic herpes virus 1                                                             | Adverse events<br>ORR                                          |
| 05120271                                                                                                                 | 1/2   | 98  | - BOXR1030<br>- Lymphodepleting chemotherapy for GPC3+ MCC                 | - GPC3-targeted CAR T Cell therapy                                                     | Treatment-emergent adverse events, MTD, Dose-limiting toxicity |
| 04853602                                                                                                                 | EAP   |     | - Intralesional IFx-Hu2.0 for skin, LN metastasis                          | - Plasmid DNA vaccine encoding for Emm55                                               |                                                                |
| 04047251                                                                                                                 | 2     | 96  | - FF-10850 Topotecan Liposome Injection                                    | - A novel liposomal form of Topotecan                                                  | Dose-limiting toxicity, Adverse events, MTD, RP2D              |
| 05267626                                                                                                                 | 1/2   | 126 | - AU-007                                                                   | - Anti-IL-2 antibody inhibiting IL-2Ra binding                                         | Dose-limiting toxicity, Adverse events, MTD, RP2D              |
| 03544723                                                                                                                 | 2     | 40  | - Intralesional Adp53<br>- ICI                                             | Adenoviral p53 gene therapy                                                            | ORR<br>Safety                                                  |
| 04276597                                                                                                                 | 2     | 50  | - 177Lu-DOTATOC                                                            | - 177Lu labeled somatostatin receptors targeting ligand                                | ORR                                                            |

|          |   |     |                                                                              |                                                                                   |                                              |
|----------|---|-----|------------------------------------------------------------------------------|-----------------------------------------------------------------------------------|----------------------------------------------|
| 02479698 | 2 | 30  | - BK-CTLs                                                                    | - Allogeneic, HLA-matched BK-specific cytotoxic T-lymphocytes                     | Safety<br>Incidence of GVHD<br>Response rate |
| 04246671 | 1 | 45  | - TAEK-VAC-HerBy vaccine                                                     | - Therapeutic vaccine                                                             | Dose-limiting toxicity                       |
| 04242199 | 1 | 140 | - INCB099280                                                                 | - Targets microsatellite instability-high/mismatch repair deficient tumors        | Treatment-emergent adverse events            |
| 04272034 | 1 | 140 | - INCB099318                                                                 | - Targets microsatellite instability-high/mismatch repair deficient tumors        | Treatment-emergent adverse events            |
| 04596033 | 1 | 24  | - GEN-011<br>- IL-2 +/-<br>- Lymphodepletion (fludarabine, cyclophosphamide) | - Adoptive T cell therapy with identified immunogenic neoantigens from each tumor | Safety                                       |
| 03935893 | 2 | 240 | - Lymphodepletion<br>- Autologous TIL<br>- IL-2                              | - Adoptive transfer of autologous TIL                                             | ORR                                          |
| 05076760 | 1 | 18  | - Intralesional MEM-282 with expected abscopal effect                        | - Oncolytic adenovirus encoding for IFN $\beta$ and CD40-ligand                   | MTD<br>Safety                                |
